# Supplementary material for: Chemokine mediated signalling within arteries promotes vascular smooth muscle cell recruitment
Source: PubMed Central journal article supplement (PMC7719186; doi:10.1038/s42003-020-01462-7), 2020-12-04
Supplement: 42003_2020_1462_MOESM2_ESM.pdf [file 42003_2020_1462_MOESM2_ESM.pdf]

## **Description of Additional Supplementary Files**

File Name: Supplementary Movie 1

Description: Live imaging of blood flow in *klf2a $\Delta$ 8/ $\Delta$ 8* wild type siblings. Images were acquired at 20 frames/second across a 15 second time course. Blood flow through the axial vasculature is readily observed.

File Name: Supplementary Movie 2

Description: Live imaging of blood flow in *klf2a $\Delta$ 8/ $\Delta$ 8* mutant embryos. Images were acquired at 20 frames/second across a 15 second time course. Blood flow through the axial vasculature is readily observed.

File Name: Supplementary Data 1

Description: Source data
